# Supplementary material for: LasR Variant Cystic Fibrosis Isolates Reveal an Adaptable Quorum-Sensing Hierarchy in Pseudomonas aeruginosa
Source: PubMed Central journal article supplement (PMC5050340; doi:10.1128/mbio.01513-16), 2016-10-04
Supplement: mbo005163010st1.pdf [file mbo005163010st1.pdf]

Table S1. *lasR* sequence characterization of all 205 isolates in this study

| Isolate designation | <i>lasR</i> associated mutation | Nucleotide change                     | Amino acid change     |
|---------------------|---------------------------------|---------------------------------------|-----------------------|
| E01                 | whole gene deletion             |                                       |                       |
| E02                 | whole gene deletion             |                                       |                       |
| E03                 | whole gene deletion             |                                       |                       |
| E04                 | whole gene deletion             |                                       |                       |
| E05                 | whole gene deletion             |                                       |                       |
| E06                 | whole gene deletion             |                                       |                       |
| E07                 | whole gene deletion             |                                       |                       |
| E08                 | whole gene deletion             |                                       |                       |
| E09                 | whole gene deletion             |                                       |                       |
| E10                 | whole gene deletion             |                                       |                       |
| E11                 | whole gene deletion             |                                       |                       |
| E12                 | whole gene deletion             |                                       |                       |
| E13                 | whole gene deletion             |                                       |                       |
| E14                 | whole gene deletion             |                                       |                       |
| E15                 | whole gene deletion             |                                       |                       |
| E16                 | whole gene deletion             |                                       |                       |
| E17                 | whole gene deletion             |                                       |                       |
| E18                 | whole gene deletion             |                                       |                       |
| E19                 | whole gene deletion             |                                       |                       |
| E20                 | whole gene deletion             |                                       |                       |
| E21                 | whole gene deletion             |                                       |                       |
| E22                 | whole gene deletion             |                                       |                       |
| E23                 | whole gene deletion             |                                       |                       |
| E24                 | whole gene deletion             |                                       |                       |
| E25                 | whole gene deletion             |                                       |                       |
| E26                 | whole gene deletion             |                                       |                       |
| E27                 | whole gene deletion             |                                       |                       |
| E28                 | whole gene deletion             |                                       |                       |
| E29                 | whole gene deletion             |                                       |                       |
| E30                 | Non-synonymous                  | G377A                                 | G126D                 |
| E31                 | Non-synonymous                  | C133T                                 | Q45Stop               |
| E32                 | Non-synonymous                  | C649T                                 | R217W                 |
| E33                 | Non-synonymous                  | G61A                                  | A21T                  |
| E34                 | Non-synonymous                  | C292T                                 | Q98Stop               |
| E35                 | Insertion                       | IS Element @ 563                      | IS Element            |
| E36                 | Deletion                        | 13 bp deletion @ 493 (-CTGGCCTTCGAAC) | Frameshift            |
| E37                 | Non-synonymous                  | G588T                                 | E196D                 |
| E38                 | Deletion                        | 11 bp deletion @ 98 (-CGAAGATCCTG)    | Frameshift            |
| E39                 | Non-synonymous                  | G541A                                 | E181K                 |
| E40                 | Non-synonymous                  | C670T                                 | R224C                 |
| E41                 | Non-synonymous                  | G31T                                  | E11Stop               |
| E42                 | Non-synonymous                  | G671A                                 | R224H                 |
| E43                 | Deletion                        | 1 bp deletion @ 407 (-A)              | Frameshift            |
| E44                 | Non-synonymous                  | C221T                                 | P74L                  |
| E45                 | Non-synonymous                  | C70T                                  | Q24Stop               |
| E46                 | Deletion                        | 3 bp deletion @ 349 (-CCG)            | 1 aa deletion (-P117) |

|     |                |                                        |            |
|-----|----------------|----------------------------------------|------------|
| E47 | Insertion      | 1 bp insertion @ 342 (+T)              | Frameshift |
| E48 | Non-synonymous | C181A                                  | R61S       |
| E49 | Non-synonymous | G56A                                   | W19Stop    |
| E50 | Non-synonymous | C564A                                  | C188Stop   |
| E51 | Wildtype       | Wildtype                               | Wildtype   |
| E52 | Non-synonymous | C706T                                  | L236F      |
| E53 | Insertion      | IS Element @ 129                       | IS Element |
| E54 | Non-synonymous | C350T                                  | P117L      |
| E55 | Non-synonymous | G386A                                  | S129N      |
| E56 | Non-synonymous | G338A                                  | G113E      |
| E57 | Non-synonymous | G307T                                  | E103Stop   |
| E58 | Non-synonymous | C692T                                  | A231V      |
| E59 | Non-synonymous | A625G                                  | N209D      |
| E60 | Non-synonymous | T68G                                   | L23R       |
| E61 | Non-synonymous | T707G                                  | L236R      |
| E62 | Non-synonymous | A467T                                  | D156V      |
| E63 | Non-synonymous | A653G                                  | K218R      |
| E64 | Deletion       | 5 bp deletion @ 445 (-CCGAC)           | Frameshift |
| E65 | Non-synonymous | G616A                                  | A206T      |
| E66 | Non-synonymous | C221A                                  | P74Q       |
| E67 | Non-synonymous | G179A                                  | W60Stop    |
| E68 | Non-synonymous | T227G                                  | V76G       |
| E69 | Non-synonymous | C611A                                  | S204Stop   |
| E70 | Non-synonymous | C631A                                  | H211N      |
| E71 | Non-synonymous | T592C                                  | S198P      |
| E72 | Non-synonymous | C556T                                  | Q186Stop   |
| E73 | Non-synonymous | G622A                                  | V208M      |
| E74 | Non-synonymous | G676                                   | V226I      |
| E75 | Non-synonymous | C670A                                  | R224S      |
| E76 | Non-synonymous | G184C                                  | E62Stop    |
| E77 | Non-synonymous | G571A                                  | G191S      |
| E78 | Non-synonymous | C665T                                  | T222I      |
| E79 | Insertion      | IS Element @ 130                       | IS Element |
| E80 | Deletion       | 4 bp deletion @ 319 bp (-GGCC)         | Frameshift |
| E81 | Deletion       | 13 bp deletion @ 389 (-TCAGCGTGGGAAGC) | Frameshift |
| E82 | Insertion      | IS Element @ 630                       | IS Element |
| E83 | Non-synonymous | C413T                                  | A138V      |
| E84 | Non-synonymous | G704C                                  | G235A      |
| E85 | Insertion      | IS Element @ 143                       | IS Element |
| E86 | Deletion       | 11 bp deletion @ 97 (-TCGAAGATCCT)     | Frameshift |
| E87 | Insertion      | IS Element @ 241                       | IS Element |
| E88 | Non-synonymous | C692A                                  | A231D      |
| E89 | Non-synonymous | G543C                                  | E181D      |
| E90 | Deletion       | 1 bp deletion @ 170 (-C)               | Frameshift |
| E91 | Insertion      | IS Element @ 705                       | IS Element |
| E92 | Non-synonymous | G490T                                  | G164Stop   |
| E93 | Insertion      | IS Element @ 140                       | IS Element |
| E94 | Insertion      | IS Element @ 139                       | IS Element |
| E95 | Non-synonymous | G671T                                  | R224L      |

|      |                |                                                                     |                                              |
|------|----------------|---------------------------------------------------------------------|----------------------------------------------|
| E96  | Insertion      | IS Element @ 266                                                    | IS Element                                   |
| E97  | Insertion      | IS Element @ 600                                                    | IS Element                                   |
| E98  | Insertion      | 1 bp insertion @ 415 (+C)                                           | Frameshift                                   |
| E99  | Non-synonymous | T629G                                                               | F210C                                        |
| E100 | Non-synonymous | A641G                                                               | N214S                                        |
| E101 | Deletion       | 1 bp deletion @ 422 (-A)                                            | Frameshift                                   |
| E102 | Non-synonymous | C646T                                                               | R216W                                        |
| E103 | Non-synonymous | T68C                                                                | L23P                                         |
| E104 | Non-synonymous | A532G                                                               | T178A                                        |
| E105 | Deletion       | 2 bp deletion @ 2 (-TG)                                             | Frameshift                                   |
| E106 | Non-synonymous | C239T                                                               | T80I                                         |
| E107 | Non-synonymous | G539A                                                               | R180Q                                        |
| E108 | Non-synonymous | C355T                                                               | H119Y                                        |
| E109 | Non-synonymous | A223C                                                               | T75P                                         |
| E110 | Non-synonymous | G25A                                                                | E9K                                          |
| E111 | Non-synonymous | A542G                                                               | E181G                                        |
| E112 | Insertion      | IS Element @ 716                                                    | IS Element                                   |
| E113 | Non-synonymous | T55C                                                                | W19R                                         |
| E114 | Insertion      | 1 bp insertion @ 452 (+C)                                           | Frameshift                                   |
| E115 | Non-synonymous | C220T                                                               | P74S                                         |
| E116 | Non-synonymous | C683A                                                               | A228D                                        |
| E117 | Non-synonymous | A712G                                                               | T238A                                        |
| E118 | Insertion      | 1 bp insertion @ 449 (+C)                                           | Frameshift                                   |
| E119 | Insertion      | IS Element @ 463                                                    | IS Element                                   |
| E120 | Insertion      | 8 bp insertion @ 639 (+CATATGGG)                                    | Frameshift                                   |
| E121 | Non-synonymous | G376T                                                               | G126C                                        |
| E122 | Non-synonymous | G92T                                                                | G31V                                         |
| E123 | Non-synonymous | C617T                                                               | A206V                                        |
| E124 | Non-synonymous | G376A                                                               | G126S                                        |
| E125 | Non-synonymous | C280T                                                               | Q94Stop                                      |
| E126 | Non-synonymous | G654T                                                               | K218N                                        |
| E127 | Non-synonymous | C564G                                                               | C188W                                        |
| E128 | Insertion      | IS Element @ 551                                                    | IS Element                                   |
| E129 | Non-synonymous | C149T                                                               | A50V                                         |
| E130 | Non-synonymous | T662A                                                               | V221E                                        |
| E131 | Non-synonymous | A580G                                                               | S194G                                        |
| E132 | Insertion      | 1 bp insertion @ 173 (+G)                                           | Frameshift                                   |
| E133 | Non-synonymous | G313A                                                               | A105T                                        |
| E134 | Non-synonymous | C683T                                                               | A228V                                        |
| E135 | Deletion       | 30 bp deletion @ 604 (-AACTGCTCGGAAGCCAATGTGAACTTCCAT)              | 10 aa deletion (-NCSEANVNFH 201-212)         |
| E136 | Deletion       | 11 bp deletion @ 423 (-CCGTTTCATGG)                                 | Frameshift                                   |
| E137 | Non-synonymous | G455A                                                               | W152Stop                                     |
| E138 | Deletion       | 14 bp deletion @ 565 (-GCCATCGGCAAGAC)                              | Frameshift                                   |
| E139 | Non-synonymous | T178G                                                               | W60G                                         |
| E140 | Deletion       | 1 bp deletion @ 564 (-C)                                            | Frameshift                                   |
| E141 | Insertion      | 42 bp insertion @ 141 (+GAAGATCCTGTTCGGCCTGTTGCCTAAGGACAGCCAGGACTA) | Stop + 7 aa insertion @ 47 (+*KILFGLLPKDSQD) |
| E142 | Non-synonymous | C219A                                                               | D73E                                         |
| E143 | Non-synonymous | A605T                                                               | N202I                                        |
| E144 | Non-synonymous | G585A                                                               | W195Stop                                     |

|      |                |                                                   |                                  |
|------|----------------|---------------------------------------------------|----------------------------------|
| E145 | Non-synonymous | C219G                                             | D73E                             |
| E146 | Non-synonymous | G638A                                             | G213E                            |
| E147 | Deletion       | 2 bp deletion @ 562 (-TG)                         | Frameshift                       |
| E148 | Non-synonymous | C165A                                             | N55K                             |
| E149 | Deletion       | 1 bp deletion @ 337 (-G)                          | Frameshift                       |
| E150 | Non-synonymous | G377C                                             | G126A                            |
| E151 | Non-synonymous | G199C                                             | A67P                             |
| E152 | Non-synonymous | G182A                                             | R61H                             |
| E153 | Insertion      | IS Element @ 647                                  | IS Element                       |
| E154 | Non-synonymous | C350T                                             | P117L                            |
| E155 | Non-synonymous | T559C                                             | W187R                            |
| E156 | Non-synonymous | G226T                                             | V76F                             |
| E157 | Deletion       | 1 bp deletion @ 414 (-C)                          | Frameshift                       |
| E158 | Non-synonymous | G661A                                             | V221M                            |
| E159 | Non-synonymous | G264A                                             | W88Stop                          |
| E160 | Insertion      | 3 bp insertion @ 334 (+TTG)                       | 1 aa insertion @ 112 (+L)        |
| E161 | Insertion      | 1 bp insertion @ 452 (+A)                         | Frameshift                       |
| E162 | Non-synonymous | C529G                                             | L177V                            |
| E163 | Non-synonymous | G691A                                             | A231T                            |
| E164 | Non-synonymous | G415T                                             | E139Stop                         |
| E165 | Non-synonymous | G703A                                             | G235S                            |
| E166 | Non-synonymous | G654C                                             | K218N                            |
| E167 | Deletion       | 1 bp deletion @ 339 (-G)                          | Frameshift                       |
| E168 | Non-synonymous | T707C                                             | L236P                            |
| E169 | Non-synonymous | C437A                                             | S146Stop                         |
| E170 | Insertion      | 24 bp insertion @ 355 (+GTGTATGGGCTGACCATGCCGCTG) | 8 aa insertion @ 119 (+VYGLTMPL) |
| E171 | Non-synonymous | T316C                                             | S106P                            |
| E172 | Non-synonymous | G57A                                              | W19Stop                          |
| E173 | Deletion       | 10 bp deletion @ 583 (-TGGGAGATAT)                | Frameshift                       |
| E174 | Non-synonymous | T583A                                             | W195R                            |
| E175 | Deletion       | 1 bp deletion @ 663 (-G)                          | Frameshift                       |
| E176 | Deletion       | 10 bp deletion @ 627 (-CTCCATATG)                 | Frameshift                       |
| E177 | Non-synonymous | G386A                                             | S129N                            |
| E178 | Non-synonymous | G319C                                             | A107P                            |
| E179 | Non-synonymous | G560A                                             | W187Stop                         |
| E180 | Non-synonymous | G547A                                             | E183K                            |
| E181 | Insertion      | IS Element @ 561                                  | IS Element                       |
| E182 | Insertion      | 4 bp insertion @ 580 (+GACC)                      | Frameshift                       |
| E183 | Non-synonymous | C478T                                             | Q160Stop                         |
| E184 | Non-synonymous | G337C                                             | G113R                            |
| E185 | Non-synonymous | C668A                                             | S223Y                            |
| E186 | Non-synonymous | C314T                                             | A105V                            |
| E187 | Insertion      | IS Element @ 239                                  | IS Element                       |
| E188 | Non-synonymous | T452C                                             | L151P                            |
| E189 | WT             |                                                   |                                  |
| E190 | WT             |                                                   |                                  |
| E191 | WT             |                                                   |                                  |
| E192 | WT             |                                                   |                                  |
| E193 | WT             |                                                   |                                  |

|      |                |                                    |                               |
|------|----------------|------------------------------------|-------------------------------|
| E194 | WT             |                                    |                               |
| E195 | WT             |                                    |                               |
| E196 | WT             |                                    |                               |
| E197 | WT             |                                    |                               |
| E198 | WT             |                                    |                               |
| E199 | Insertion      | 1 bp insertion @ 281 (+C)          | Frameshift                    |
| E200 | Non-synonymous | G217A                              | D73N                          |
| E201 | Non-synonymous | T607A                              | C203S                         |
| E202 | Insertion      | IS Element @ 467                   | IS Element                    |
| E203 | Non-synonymous | G682C                              | A228P                         |
| E204 | Non-synonymous | C254T                              | P85L                          |
| E205 | Deletion       | 3 bp deletion @ 637 (-GGA) + A640G | 1 aa deletion (-G213) + N214D |

---
