# Supplementary material for: LasR Variant Cystic Fibrosis Isolates Reveal an Adaptable Quorum-Sensing Hierarchy in Pseudomonas aeruginosa
Source: PubMed Central journal article supplement (PMC5050340; doi:10.1128/mbio.01513-16), 2016-10-04
Supplement: mbo005163010st2.pdf [file mbo005163010st2.pdf]

Table S2. Association between LasR function, colony morphology, and growth with nitrate<sup>a</sup>

| <b>Phenotype</b>                                                | <b>Genotype</b>                    |                                          |
|-----------------------------------------------------------------|------------------------------------|------------------------------------------|
|                                                                 | <b>Wild type LasR<br/>(n=1996)</b> | <b>Inactivating mutation<br/>(n=268)</b> |
| Lysis, sheen, or both <sup>b</sup>                              | 171 (8.6 <sup>c</sup> )            | 190 (70.9)                               |
| Neither lysis nor sheen                                         | 1825 (91.4)                        | 78 (29.1)                                |
| NO <sub>3</sub> growth advantage <sup>d</sup>                   | 170 (8.5)                          | 69 (25.7)                                |
| No NO <sub>3</sub> growth advantage                             | 1826 (91.5)                        | 199 (74.3)                               |
| Lysis, sheen, and NO <sub>3</sub> growth advantage <sup>e</sup> | 18 (0.9)                           | 44 (16.4)                                |

<sup>a</sup>Isolates for which we could not determine LasR functionality are not included.

<sup>b</sup>Colony morphology of isolates grown on LB agar as described in Ref. 3.

<sup>c</sup>Data in parentheses represents the percent of isolates with specific phenotype.

<sup>d</sup>Growth advantage with nitrate (NO<sub>3</sub>) supplementation as described in Ref. 18.

<sup>e</sup>Isolates that display lysis and sheen and have increased growth with nitrate.
