# Supplementary material for: LasR Variant Cystic Fibrosis Isolates Reveal an Adaptable Quorum-Sensing Hierarchy in Pseudomonas aeruginosa
Source: PubMed Central journal article supplement (PMC5050340; doi:10.1128/mbio.01513-16), 2016-10-04
Supplement: mbo005163010st3.pdf [file mbo005163010st3.pdf]

Table S3. Effect of AiiA treatment on measured signal concentrations

| Strain or isolate  | 3OC <sub>12</sub> -HSL (μM) |         | C <sub>4</sub> -HSL (μM) |         |
|--------------------|-----------------------------|---------|--------------------------|---------|
|                    | - AiiA                      | + AiiA  | - AiiA                   | + AiiA  |
| PAO1               | 2.80                        | 0.044   | 4.60                     | < 0.005 |
| PAO1 $\Delta lasR$ | < 0.005                     | < 0.005 | 0.47                     | < 0.005 |
| E57                | 0.026                       | < 0.005 | 5.15                     | < 0.005 |
| E91                | 0.011                       | < 0.005 | 5.53                     | < 0.005 |
| E113               | 0.045                       | < 0.005 | 7.27                     | 0.028   |
| E188               | 0.018                       | < 0.005 | 6.06                     | < 0.005 |
| E202               | 0.013                       | < 0.005 | 12.71                    | < 0.005 |
